# Supplementary material for: Honing-in antigen-specific cells during antibody discovery: a user-friendly process to mine a deeper repertoire
Source: PubMed Central journal article supplement (PMC9618561; doi:10.1038/s42003-022-04129-7), 2022-10-30
Supplement: 42003_2022_4129_MOESM2_ESM.pdf [file 42003_2022_4129_MOESM2_ESM.pdf]

## Description of Additional Supplementary Files

**File name:** Supplementary Data

**Description:** The source data behind the graphs in the paper.
